# Supplementary material for: Perturbations of the Proteome and of Secreted Metabolites in Primary Astrocytes from the hSOD1(G93A) ALS Mouse Model
Source: MDPI journal article supplement (doi:10.3390/ijms22137028), 2021-06-29
Supplement: s1 [file s1]

| Name (Manually annotated)   | KEGG pathway/ <i>compounds</i>                     | Formula                                                        | G93A/WT ratio | p-value  | RT (min) | <i>m/z</i> | Adduct                   |
|-----------------------------|----------------------------------------------------|----------------------------------------------------------------|---------------|----------|----------|------------|--------------------------|
| Decanoic acid               | <u>Fatty acid biosynthesis</u>                     | C <sub>10</sub> H <sub>20</sub> O <sub>2</sub>                 | 1.703         | 2.85E-04 | 1.11     | 171.139    | [M-H]-                   |
| Octanoic acid               |                                                    | C <sub>8</sub> H <sub>16</sub> O <sub>2</sub>                  | 1.672         | 1.43E-07 | 1.112    | 143.1076   | [M-H]-                   |
| Hexadecanoic acid           |                                                    | C <sub>16</sub> H <sub>32</sub> O <sub>2</sub>                 | 1.663         | 1.73E-08 | 1.082    | 255.2329   | [M-H]-                   |
| Dodecanoic acid             |                                                    | C <sub>12</sub> H <sub>24</sub> O <sub>2</sub>                 | 1.632         | 2.00E-03 | 1.101    | 199.1702   | [M-H]-                   |
| Hexadecenoic acid           |                                                    | C <sub>16</sub> H <sub>30</sub> O <sub>2</sub>                 | 1.521         | 2.08E-07 | 1.084    | 253.2172   | [M-H]-                   |
| Nonanoic acid               | <u>Fatty acids</u>                                 | C <sub>9</sub> H <sub>18</sub> O <sub>2</sub>                  | 1.572         | 4.11E-04 | 1.115    | 157.1232   | [M-H]-                   |
| Undecanoic acid             | <u>Fatty acids</u>                                 | C <sub>11</sub> H <sub>22</sub> O <sub>2</sub>                 | 1.549         | 3.99E-03 | 1.105    | 185.1546   | [M-H]-                   |
| Oxoglutaric acid            | <u>Alanine, aspartate and glutamate metabolism</u> | C <sub>5</sub> H <sub>6</sub> O <sub>5</sub>                   | 0.58          | 3.38E-08 | 1.41     | 145.0142   | [M-H]-                   |
| Oxoglutaramic acid          |                                                    | C <sub>5</sub> H <sub>7</sub> NO <sub>4</sub>                  | 1.5           | 9.66E-05 | 8.083    | 126.0196   | [M-H <sub>2</sub> O-H]-  |
| Succinic acid semialdehyde  |                                                    | C <sub>4</sub> H <sub>6</sub> O <sub>3</sub>                   | 0.529         | 2.92E-13 | 1.42     | 101.0239   | [M-H]-                   |
| Isoprene                    | <u>Biosynthesis of terpenoids and steroids</u>     | C <sub>5</sub> H <sub>8</sub>                                  | 0.452         | 5.72E-04 | 1.352    | 127.0764   | [M+CH <sub>3</sub> COO]- |
| D-Lombricine                | <u>Glycine, serine and threonine metabolism</u>    | C <sub>6</sub> H <sub>15</sub> N <sub>4</sub> O <sub>6</sub> P | 2.081         | 1.09E-08 | 6.656    | 269.0669   | [M-H]-                   |
| Ectoine                     |                                                    | C <sub>6</sub> H <sub>10</sub> N <sub>2</sub> O <sub>2</sub>   | 1.508         | 1.89E-03 | 8.084    | 187.0724   | [M+FA-H]-                |
| Citraconic acid             | <u>Valine, leucine and isoleucine biosynthesis</u> | C <sub>5</sub> H <sub>6</sub> O <sub>4</sub>                   | 1.667         | 4.00E-06 | 1.401    | 129.0197   | [M-H]-                   |
| Galactosylglycerol          | <u>Glycerolipid metabolism</u>                     | C <sub>9</sub> H <sub>18</sub> O <sub>8</sub>                  | 0.586         | 5.11E-06 | 1.338    | 275.0757   | [M+Na-2H]-               |
| Phosphatidic acid           |                                                    | C <sub>24</sub> H <sub>34</sub> N <sub>6</sub> O <sub>2</sub>  | 0.502         | 8.47E-08 | 1.269    | 419.257    | [M-H <sub>2</sub> O-H]-  |
| Gamma-L-glutamyl-L-tyrosine | <u>Glutathione metabolism</u>                      | C <sub>14</sub> H <sub>18</sub> N <sub>2</sub> O <sub>6</sub>  | 0.615         | 2.29E-04 | 9.16     | 309.1097   | [M-H]-                   |
| Pantothenic acid            | <u>Pantothenate and CoA biosynthesis</u>           | C <sub>9</sub> H <sub>17</sub> NO <sub>5</sub>                 | 0.663         | 7.48E-04 | 1.274    | 200.093    | [M-H <sub>2</sub> O-H]-  |
| Cysteine-S-sulfate          | <u>Cysteine and methionine metabolism</u>          | C <sub>3</sub> H <sub>7</sub> NO <sub>5</sub> S <sub>2</sub>   | 0.245         | 2.18E-20 | 8.079    | 199.9694   | [M-H]-                   |

**Supplementary Table S1 – Altered metabolites in CM of hSOD1(G93A) primary astrocytes.** Annotation and KEGG metabolic pathways of CM metabolites detected in the ESI – polarity whose expression ratio (hSOD1(G93A) vs hSOD1(WT) astrocytes) was < 0.66 and > 1.50 (p-value < 0.05, Wilcoxon rank-sum test) were reported. The measured *m/z*, the chromatographic retention time (RT), and proposed adduct were detailed.

| Uniprot Accession | Gene Name    | Protein Name                                                | ratio G93A/WT | p-value             |
|-------------------|--------------|-------------------------------------------------------------|---------------|---------------------|
| <b>P10605</b>     | <b>Ctsb</b>  | <b>Cathepsin B</b>                                          | <b>1.307</b>  | <b>0.006; 0.049</b> |
| <b>Q9WUU7</b>     | <b>Ctsz</b>  | <b>Cathepsin Z</b>                                          | <b>1.484</b>  | <b>0.008; 0.049</b> |
| O70370            | Ctss         | Cathepsin S                                                 | 1.374         | 0.014; <b>0.049</b> |
| P99026            | Psmb4        | Proteasome subunit beta type-4                              | 1.321         | 0.005; <b>0.049</b> |
| <b>Q9CPS5</b>     | <b>Psmc8</b> | <b>26S proteasome non-ATPase regulatory subunit 8</b>       | <b>1.356</b>  | <b>0.036; 0.049</b> |
| A0A0R4J0I9        | Lrp1         | Low density lipoprotein receptor-related protein 1          | 1.987         | 0.043; <b>0.049</b> |
| O89053            | Coro1a       | Coronin-1A                                                  | 1.329         | 0.001; <b>0.049</b> |
| <b>P13020</b>     | <b>Gsn</b>   | <b>Gelsolin</b>                                             | <b>1.344</b>  | <b>0.012; 0.049</b> |
| O70200            | Aif1         | Allograft inflammatory factor 1                             | 1.356         | 0.036; <b>0.049</b> |
| Q5SW88            | Rab1a        | RAB1A, member RAS oncogene family                           | 1.467         | 0.010; <b>0.049</b> |
| P20060            | Hexb         | Beta-hexaminidase subunit beta                              | 1.429         | 0.005; <b>0.049</b> |
| A0A087WS56        | Fn1          | Fibronectin                                                 | 1.612         | 0.008; <b>0.049</b> |
| Q9DAK9            | Phpt1        | 14 kDa phosphohistidine phosphatase                         | 1.388         | 0.020; <b>0.049</b> |
| Q64282            | Ifit1        | Interferon-induced protein with tetratricopeptide repeats 1 | 1.590         | 0.032; <b>0.049</b> |
| Q9D115            | Znf706       | Zinc finger protein 706                                     | 2.115         | 0.047; <b>0.049</b> |
| P19324            | Serpinh1     | Serpin H1                                                   | 1.321         | 0.005; <b>0.049</b> |
| Q8C845            | Efh2         | EF-hand domain-containing protein D2                        | 1.514         | 0.024; <b>0.049</b> |
| Q91VW3            | Sh3bgrl3     | SH3 domain-binding glutamic acid-rich-like protein 3        | 1.384         | 0.041; <b>0.049</b> |

**Supplementary Table S2- Up-regulated proteins in hSOD1(G93A) primary spinal astrocytes.** Among the 640 proteins identified and quantified in hSOD1(WT) and hSOD1(G93A) astrocytes, the only proteins whose expression ratio (G93A vs WT cells) was >1.33 (p-value <0.05, two-tailed t-test) are reported. UNIPROT accessions, gene names, and protein names are reported in the first three columns. In the last column the p-values obtained with either a two-tailed Student's t-test (in black) and the Wilcoxon Rank sum test (un-paired, two-sided; confidence level 0.95) (in blue) are reported. Subsequent validation analysis by Western blot was performed only for proteins reported in bold.

| Uniprot accession | Gene name    | Protein Name                                                             | Ratio G93A/WT | p-value             |
|-------------------|--------------|--------------------------------------------------------------------------|---------------|---------------------|
| <b>O09131</b>     | <b>Gsto1</b> | <b>Glutathione S-transferase omega-1</b>                                 | <b>0.420</b>  | <b>0.033; 0.049</b> |
| Q9CPU0            | Glo1         | Lactoylglutathione lyase                                                 | 0.648         | 0.046; <b>0.049</b> |
| <b>P97494</b>     | <b>Gclc</b>  | <b>Glutamate--cysteine ligase catalytic subunit</b>                      | <b>0.672</b>  | <b>0.043; 0.049</b> |
| O88531            | Ppt1         | Palmitoyl-protein thioesterase 1                                         | 0.646         | 0.022; <b>0.049</b> |
| Q8VCQ8            | Cald1        | Caldesmon 1                                                              | 0.743         | 0.001; <b>0.049</b> |
| Q3TT92            | Dpysl3       | Dihydropyrimidinase-related protein 3                                    | 0.751         | 0.031; <b>0.049</b> |
| P97315            | Csrp1        | Cysteine and glycine-rich protein 1                                      | 0.764         | 0.011; <b>0.049</b> |
| G3UVV4            | Hk1          | Hexokinase 1, isoform CRA_f                                              | 0.681         | 0.032; <b>0.049</b> |
| Q08091            | Cnn1         | Calponin-1                                                               | 0.701         | 0.001; <b>0.049</b> |
| Q8BZF8            | Pgm5         | Posphoglucomutase-like protein 5                                         | 0.706         | 0.049; <b>0.049</b> |
| D3YYE1            | Anp32a       | Acidic leucine-rich nuclear phosphoprotein 32 family member A (Fragment) | 0.710         | 0.010; <b>0.049</b> |
| Q9R0P9            | Uchl1        | Ubiquitin carboxyl-terminal hydrolase isozyme L1                         | 0.710         | 0.040; <b>0.049</b> |
| G3X9T8            | Cp           | Ceruloplasmin                                                            | 0.733         | 0.047; <b>0.049</b> |
| P37804            | Tagln        | Transgelin                                                               | 0.739         | 0.021; <b>0.049</b> |
| A2AIM4            | Tpm2         | Tropomyosin beta chain                                                   | 0.759         | 0.005; <b>0.049</b> |
| P50543            | S100a11      | Protein S100-A11                                                         | 0.770         | 0.030; <b>0.049</b> |
| O55022            | Pgrmc1       | Membrane-associated progesterone receptor component 1                    | 0.624         | 0.018; <b>0.049</b> |
| P51655            | Gpc4         | Glypican-4                                                               | 0.667         | 0.004; <b>0.049</b> |
| E9PWK1            | Ephx1        | Epoxide hydrolase                                                        | 0.749         | 0.045; <b>0.049</b> |
| H3BLJ9            | Esd          | S-formylglutathione hydrolase                                            | 0.621         | 0.046; <b>0.049</b> |

**Supplementary Table S3 - Down-regulated proteins in hSOD1(G93A) primary astrocytes.** Among the 640 proteins identified and quantified in hSOD1(WT) and hSOD1(G93A) astrocytes, the only proteins whose expression ratio (G93A vs WT cells) was <0.77 (p-value <0.05, two-tailed t-test) are reported. Other details are as in Supplementary Table 2.
